# Supplementary material for: Is Telemedicine Suitable for Patients with Chronic Inflammatory Skin Conditions? A Systematic Review
Source: PubMed Central journal article supplement — Acta Derm Venereol. 2024 May 15;104:23901. doi: 10.2340/actadv.v104.23901 (PMC11110807; doi:10.2340/actadv.v104.23901), 2024-05-15
Supplement: ActaDV-104-23901-s1.pdf [file ActaDV-104-23901-s1.pdf]

Supplementary material has been published as submitted. It has not been copyedited, or typeset by Acta Dermato-Venereologica

## APPENDIX S1

Database: Ovid MEDLINE(R) ALL

|    |                                                                                                                                                                                                                                                                                                                                                                                                                                                                                                                                                                                          |
|----|------------------------------------------------------------------------------------------------------------------------------------------------------------------------------------------------------------------------------------------------------------------------------------------------------------------------------------------------------------------------------------------------------------------------------------------------------------------------------------------------------------------------------------------------------------------------------------------|
| 1  | Telemedicine/                                                                                                                                                                                                                                                                                                                                                                                                                                                                                                                                                                            |
| 2  | Remote Consultation/                                                                                                                                                                                                                                                                                                                                                                                                                                                                                                                                                                     |
| 3  | (Telephone/ or Cellular Phone/ or Text Messaging/) and (counsel* or follow?up or ((drug? or prescription? or disease? or outpatient? or inpatient? or patient?) adj3 (care or management or therapy or treat or treating or treatment?)) or (patient? adj2 education) or ((preventive or preventative) adj2 care) or public health or self-care).ti,ab,kf.                                                                                                                                                                                                                               |
| 4  | (teleassist\$ or tele?assist\$ or telebased or tele?based or teleconsult\$ or tele?consult\$ or telecounsel* or tele?counselling or telederm\$ or tele?derm\$ or telefollow\$ or tele?follow\$ or teleguidance or tele?guidance or telehealth\$ or tele?health\$ or telehome\$ or tele?home\$ or teleintervention\$ or tele?intervention\$ or telemanag\$ or tele?manag\$ or telemedicine or tele?medicine or telemonitor\$ or tele?monitor\$ or telenurs\$ or tele?nurs\$ or teleprocedu\$ or tele?procedu\$ or teletherap\$ or tele?therap\$ or teletreat\$ or tele?treat\$).ti,ab,kf. |
| 5  | (tele adj (care or counselling or health\$ or intervention? or manag\$ or therap\$ or treat\$ or medicine or medical or nursing)).ti,ab,kf.                                                                                                                                                                                                                                                                                                                                                                                                                                              |
| 6  | ((iphone? or i-phone? or smartphone? or PDA or Personal Digital Assistant? or telephone or telephones or TRANSTELEPHON\$ or phone or phones) and (counselling or diagnose? or diagnosing or ((drug? or prescription? or disease? or outpatient? or inpatient? or patient?) adj3 (care or management or therapy or treat or treating or treatment?)) or (patient? adj2 education) or ((preventive or preventative) adj2 care) or public health or self-care)).ti,ab,kf.                                                                                                                   |
| 7  | (telephone based or phone based or text-messag\$).ti,ab,kf.                                                                                                                                                                                                                                                                                                                                                                                                                                                                                                                              |
| 8  | Cellular Phone/                                                                                                                                                                                                                                                                                                                                                                                                                                                                                                                                                                          |
| 9  | ((cell* or mobile) adj (phone or phones or telephone or telephones)).ab,kf.                                                                                                                                                                                                                                                                                                                                                                                                                                                                                                              |
| 10 | Telephone/ or Text Messaging/                                                                                                                                                                                                                                                                                                                                                                                                                                                                                                                                                            |
| 11 | exp Telemetry/                                                                                                                                                                                                                                                                                                                                                                                                                                                                                                                                                                           |
| 12 | (iphone? or i?phone? or smartphone? or text?messag\$).ti,ab.                                                                                                                                                                                                                                                                                                                                                                                                                                                                                                                             |
| 13 | (telephone or telephones or phone or phones).ti.                                                                                                                                                                                                                                                                                                                                                                                                                                                                                                                                         |
| 14 | (videoconsult\$ or video consultation? or video consulting).ti,ab,kf.                                                                                                                                                                                                                                                                                                                                                                                                                                                                                                                    |
| 15 | ((pda adj (device or phone)) or personal digital assistant).ti,ab,kf.                                                                                                                                                                                                                                                                                                                                                                                                                                                                                                                    |
| 16 | (remote adj2 (consult\$ or monitor\$ or treat\$ or therap\$ or care)).ti,ab,kf.                                                                                                                                                                                                                                                                                                                                                                                                                                                                                                          |
| 17 | (e?care or ecare or e?consult\$ or econsult\$ or e?diagnos\$ or ediagnosis\$ or e?health\$ or ehealth\$ or e?medicine or emedicine or enurse? or enurse? or e?nursing or enursing or e?physician? or ephysician? or e?psych\$ or epsych\$ or e?therapy or etherapy or mhEALTH or M?HEALTH).ti,ab,kf.                                                                                                                                                                                                                                                                                     |
| 18 | teledermatol*.ti,ab,kf.                                                                                                                                                                                                                                                                                                                                                                                                                                                                                                                                                                  |
| 19 | <b>or/1-18</b>                                                                                                                                                                                                                                                                                                                                                                                                                                                                                                                                                                           |
| 20 | psoriasis/ or arthritis, psoriatic/                                                                                                                                                                                                                                                                                                                                                                                                                                                                                                                                                      |
| 21 | ((palmoplantaris adj2 pustulosis) or psorias?s or pustulosis).ti,ab,kf.                                                                                                                                                                                                                                                                                                                                                                                                                                                                                                                  |
| 22 | Dermatitis, Atopic/                                                                                                                                                                                                                                                                                                                                                                                                                                                                                                                                                                      |
| 23 | (atopic adj2 (dermati* or eczema)).ti,ab,kf.                                                                                                                                                                                                                                                                                                                                                                                                                                                                                                                                             |
| 24 | (eczema adj2 infantile).ti,ab,kf.                                                                                                                                                                                                                                                                                                                                                                                                                                                                                                                                                        |
| 25 | Hidradenitis Suppurativa/                                                                                                                                                                                                                                                                                                                                                                                                                                                                                                                                                                |
| 26 | ((acne adj2 inversa?) or (hidradeniti* adj2 suppurative)).ti,ab,kf.                                                                                                                                                                                                                                                                                                                                                                                                                                                                                                                      |
| 27 | Chronic Urticaria/                                                                                                                                                                                                                                                                                                                                                                                                                                                                                                                                                                       |
| 28 | ((chronic adj2 urticaria) or (autoimmune adj2 urticaria) or (idiopathic adj2 urticaria)).ti,ab,kf.                                                                                                                                                                                                                                                                                                                                                                                                                                                                                       |
| 29 | <b>or/20-28</b>                                                                                                                                                                                                                                                                                                                                                                                                                                                                                                                                                                          |
| 30 | 19 and 29                                                                                                                                                                                                                                                                                                                                                                                                                                                                                                                                                                                |
| 31 | limit 30 to yr="2022 -Current"                                                                                                                                                                                                                                                                                                                                                                                                                                                                                                                                                           |

Database: Embase

|    |                                                                                                                                                                                                                                                                                                                                                                                                                                                                        |
|----|------------------------------------------------------------------------------------------------------------------------------------------------------------------------------------------------------------------------------------------------------------------------------------------------------------------------------------------------------------------------------------------------------------------------------------------------------------------------|
| 1  | Telemedicine/                                                                                                                                                                                                                                                                                                                                                                                                                                                          |
| 2  | telemedicine/ or exp teleconsultation/ or teledermatology/ or telemonitoring/ or telepathology/ or teleradiotherapy/ or telerehabilitation/ or teletherapy/ or video consultation/                                                                                                                                                                                                                                                                                     |
| 3  | *telemetry/ and (counselling or diagnose? or diagnosing or ((drug? or prescription? or disease? or outpatient? or inpatient? or patient?) adj3 (care or management or therapy or treat or treating or treatment?)) or (patient? adj2 education) or ((preventive or preventative) adj2 care) or public health or self-care).ti,ab,kw.                                                                                                                                   |
| 4  | *Telephone/ and (counselling or ((drug? or prescription? or disease? or outpatient? or inpatient? or patient?) adj3 (care or management or therapy or treat or treating or treatment?)) or (patient? adj2 education) or ((preventive or preventative) adj2 care) or public health or self-care).ti,ab,kw.                                                                                                                                                              |
| 5  | (tele adj (care or counselling or health\$ or intervention? or manag\$ or therap\$ or treat\$ or medicine or medical or nursing)).ab,kw.                                                                                                                                                                                                                                                                                                                               |
| 6  | ((iphone? or i-phone? or smartphone? or PDA or Personal Digital Assistant? or telephone or telephones or TRANSTELEPHON\$ or phone or phones) and (counselling or diagnose? or diagnosing or ((drug? or prescription? or disease? or outpatient? or inpatient? or patient?) adj3 (care or management or therapy or treat or treating or treatment?)) or (patient? adj2 education) or ((preventive or preventative) adj2 care) or public health or self-care)).ti,ab,kw. |
| 7  | ((iphone? or i-phone? or smartphone? or PDA or Personal Digital Assistant? or telephone or telephones or TRANSTELEPHON\$ or phone or phones) adj3 (counselling or ((drug? or prescription? or disease? or outpatient? or inpatient? or patient?) adj3 (care or management or therapy or treat or treating or treatment?)) or (patient? adj2 education) or ((preventive or preventative) adj2 care) or public health or self-care)).ab,ti,kw.                           |
| 8  | (telephone based or phone based or text-messag\$).ti,ab,kw.                                                                                                                                                                                                                                                                                                                                                                                                            |
| 9  | or/1-8                                                                                                                                                                                                                                                                                                                                                                                                                                                                 |
| 10 | exp psoriasis/                                                                                                                                                                                                                                                                                                                                                                                                                                                         |
| 11 | psoriatic arthritis/                                                                                                                                                                                                                                                                                                                                                                                                                                                   |
| 12 | ((palmoplantaris adj2 pustulosis) or psorias?s or pustulosis).ti,ab,kw.                                                                                                                                                                                                                                                                                                                                                                                                |
| 13 | atopic dermatitis/                                                                                                                                                                                                                                                                                                                                                                                                                                                     |
| 14 | (atopic adj2 (dermati* or eczema)).ti,ab,kw.                                                                                                                                                                                                                                                                                                                                                                                                                           |
| 15 | (eczema adj2 infantile).ti,ab,kw.                                                                                                                                                                                                                                                                                                                                                                                                                                      |
| 16 | suppurative hidradenitis/                                                                                                                                                                                                                                                                                                                                                                                                                                              |
| 17 | ((acne adj2 inversa?) or (hidradeniti* adj2 suppurative)).ti,ab,kw.                                                                                                                                                                                                                                                                                                                                                                                                    |
| 18 | chronic urticaria/                                                                                                                                                                                                                                                                                                                                                                                                                                                     |
| 19 | ((chronic adj2 urticaria) or (autoimmune adj2 urticaria) or (idiopathic adj2 urticaria)).ti,ab,kw.                                                                                                                                                                                                                                                                                                                                                                     |
| 20 | or/10-19                                                                                                                                                                                                                                                                                                                                                                                                                                                               |
| 21 | 9 and 20                                                                                                                                                                                                                                                                                                                                                                                                                                                               |
| 22 | <b>limit 21 to (conference abstracts and conference abstract status)</b>                                                                                                                                                                                                                                                                                                                                                                                               |
| 23 | <b>21 not 22</b>                                                                                                                                                                                                                                                                                                                                                                                                                                                       |

Database: Cinahl

| Query | Limiters/Expanders                                                                                                                                                                                                                                                                                                                                                                                                                                                                                                                           |
|-------|----------------------------------------------------------------------------------------------------------------------------------------------------------------------------------------------------------------------------------------------------------------------------------------------------------------------------------------------------------------------------------------------------------------------------------------------------------------------------------------------------------------------------------------------|
| S22   | S21 Limitation: Published Date: 20220201-2020501                                                                                                                                                                                                                                                                                                                                                                                                                                                                                             |
| S21   | S12 AND S20                                                                                                                                                                                                                                                                                                                                                                                                                                                                                                                                  |
| S20   | S13 OR S14 OR S15 OR S16 OR S17 OR S18 OR S19                                                                                                                                                                                                                                                                                                                                                                                                                                                                                                |
| S19   | (MH "Chronic Urticaria") OR TI ( ((chronic N2 urticaria) or (autoimmune N2 urticaria) or (idiopathic N2 urticaria)) ) OR AB ( ((chronic N2 urticaria) or (autoimmune N2 urticaria) or (idiopathic N2 urticaria)) )                                                                                                                                                                                                                                                                                                                           |
| S18   | (MH "Chronic Urticaria")                                                                                                                                                                                                                                                                                                                                                                                                                                                                                                                     |
| S17   | (MH "Hidradenitis Suppurativa")                                                                                                                                                                                                                                                                                                                                                                                                                                                                                                              |
| S16   | (MH "Dermatitis, Atopic") OR TI ( (atopic N2 (dermati* or eczema) or (eczema N2 infantile or acne N2 inversa*) or (hidradeniti* N2 suppurative)) ) OR AB ( (atopic N2 (dermati* or eczema) or (eczema N2 infantile or acne N2 inversa*) or (hidradeniti* N2 suppurative)) )                                                                                                                                                                                                                                                                  |
| S15   | (MH "Dermatitis, Atopic")                                                                                                                                                                                                                                                                                                                                                                                                                                                                                                                    |
| S14   | ( (MH "Psoriasis+") OR (MH "Arthritis, Psoriatic") ) OR TI ( psoriasis or psoriasis or psoriatic or pustulosis ) OR AB ( psoriasis or psoriasis or psoriatic or pustulosis )                                                                                                                                                                                                                                                                                                                                                                 |
| S13   | (MH "Psoriasis+") OR (MH "Arthritis, Psoriatic")                                                                                                                                                                                                                                                                                                                                                                                                                                                                                             |
| S12   | S1 OR S2 OR S3 OR S4 OR S5 OR S6 OR S7 OR S8 OR S9 OR S10 OR S11                                                                                                                                                                                                                                                                                                                                                                                                                                                                             |
| S11   | TI teledermatol* OR AB teledermatol*                                                                                                                                                                                                                                                                                                                                                                                                                                                                                                         |
| S10   | TI ( (telephone based or phone based or text-messag*) ) OR TI ( (telephone based or phone based or text-messag*) )                                                                                                                                                                                                                                                                                                                                                                                                                           |
| S9    | AB ( (telephone based or phone based or text-messag*) ) OR TI ( (telephone based or phone based or text-messag*) )                                                                                                                                                                                                                                                                                                                                                                                                                           |
| S8    | AB ((iphone# or i-phone# or smartphone# or PDA or Personal Digital Assistant# or telephone or telephones or TRANSTELEPHON* or phone or phones) and (counselling or ((drug# or prescription# or disease# or outpatient# or inpatient# or patient#) N3 (care or management or therapy or treat or treating or treatment#)) or (patient# N2 education) or ((preventive or preventative) N2 care) or public health or self-care))                                                                                                                |
| S7    | TI ((iphone# or i-phone# or smartphone# or PDA or Personal Digital Assistant# or telephone or telephones or TRANSTELEPHON* or phone or phones) and (counselling or ((drug# or prescription# or disease# or outpatient# or inpatient# or patient#) N3 (care or management or therapy or treat or treating or treatment#)) or (patient# N2 education) or ((preventive or preventative) N2 care) or public health or self-care))                                                                                                                |
| S6    | TI (tele N2 (care or counselling or health* or intervention# or manag* or therap* or treat* or medicine or medical or nursing))                                                                                                                                                                                                                                                                                                                                                                                                              |
| S5    | AB (tele N2 (care or counselling or health* or intervention# or manag* or therap* or treat* or medicine or medical or nursing))                                                                                                                                                                                                                                                                                                                                                                                                              |
| S4    | TI ( teleassist* or telebased or teleconsult* or telecounsel* or telederm* or telefollow* or teleguidance or telehealth* or telehome* or teleintervention* or telemanag* or telemedicine or telemonitor* or telenurs* or teleprocedu* or teletherap* or teletreat* ) OR AB ( teleassist* or telebased or teleconsult* or telecounsel* or telederm* or telefollow* or teleguidance or telehealth* or telehome* or teleintervention* or telemanag* or telemedicine or telemonitor* or telenurs* or teleprocedu* or teletherap* or teletreat* ) |
| S3    | (MH Telephone or Wireless Communications or Text Messaging ) AND AB ( (counselling OR ((drug# or prescription# or disease# or outpatient# or inpatient# or patient#) N3 (care or management or therapy or treat or treating or treatment#)) or (patient# N2 education) or ((preventive or preventative) N2 care) or public health or self-care) )                                                                                                                                                                                            |
| S2    | (MH Telephone or Wireless Communications or Text Messaging ) AND TI ( (counselling OR ((drug# or prescription# or disease# or outpatient# or inpatient# or patient#) N3 (care or management or therapy or treat or treating or treatment#)) or (patient# N2 education) or ((preventive or preventative) N2 care) or public health or self-care) )                                                                                                                                                                                            |
| S1    | MH Telemedicine OR MH Telenursing OR MH Remote Consultation                                                                                                                                                                                                                                                                                                                                                                                                                                                                                  |

Database Cochrane

(teleassist\* or telebased or teleconsult\* or telecounsel\* or telederm\* or telefollow\* or teleguidance or telehealth\* or telehome\* or teleintervention\* or telemanag\* or telemedicine or telemonitor\* or telenurs\* or teleprocedu\* or teletherap\* or teletreat\*):ti,ab,kw

And (((palmoplantaris near/2 pustulosis) or psoriasis or psoriasis or pustulosis)) or (atopic near/2 (dermati\* or eczema) or (eczema near/2 infantile) or ((acne near/2 inversa\*) or (hidradeniti\* near/2 suppurative)) or ((chronic near/2 urticaria) or (autoimmune near/2 urticaria) or (idiopathic near/2 urticaria)):ti,ab,kw
