# Supplementary material for: Is Telemedicine Suitable for Patients with Chronic Inflammatory Skin Conditions? A Systematic Review
Source: PubMed Central journal article supplement — Acta Derm Venereol. 2024 May 15;104:23901. doi: 10.2340/actadv.v104.23901 (PMC11110807; doi:10.2340/actadv.v104.23901), 2024-05-15
Supplement: ActaDV-104-23901-s3.pdf [file ActaDV-104-23901-s3.pdf]

Table SI. GRADE profile for outcomes for studies investigating patients with psoriasis

| Certainty assessment                                                                    |                      |                      |                      |                          |                  |                               | Summary of the results                                                                                                                                                                                                                                                               |
|-----------------------------------------------------------------------------------------|----------------------|----------------------|----------------------|--------------------------|------------------|-------------------------------|--------------------------------------------------------------------------------------------------------------------------------------------------------------------------------------------------------------------------------------------------------------------------------------|
| Number of participants (studies)                                                        | Risk of bias         | Inconsistency        | Indirectness         | Imprecision              | Publication bias | Overall certainty of evidence |                                                                                                                                                                                                                                                                                      |
| <b>Disease severity (follow up: 6-12 months; measured with: PASI, BSA, PtGA, IGA)</b>   |                      |                      |                      |                          |                  |                               |                                                                                                                                                                                                                                                                                      |
| 394 (3 RCTs)                                                                            | serious <sup>a</sup> | serious <sup>b</sup> | not serious          | not serious              | not identified   | ⊕⊕○○<br>Low                   | The outcomes were displayed utilizing various scoring systems. While no substantial distinction was observed between the intervention and control groups, a slight advantage leaned towards the intervention group, albeit grounded in evidence of limited certainty.                |
| <b>Quality of life (follow up: 6-12 months; measured with: DLQI, CDLQI and Skindex)</b> |                      |                      |                      |                          |                  |                               |                                                                                                                                                                                                                                                                                      |
| 394 (3 RCTs)                                                                            | serious <sup>a</sup> | serious <sup>b</sup> | not serious          | not serious              | not identified   | ⊕⊕○○<br>Low                   | The outcomes were displayed utilizing various scoring systems. No substantial distinction was observed between the intervention and control groups.                                                                                                                                  |
| <b>Safety</b>                                                                           |                      |                      |                      |                          |                  |                               |                                                                                                                                                                                                                                                                                      |
| 330 (2 RCTs)                                                                            | serious <sup>a</sup> | serious <sup>b</sup> | not serious          | serious <sup>c</sup>     | not identified   | ⊕○○○<br>Very low              | Two studies reported no clinical difference in adverse events of number of irritation events during treatment                                                                                                                                                                        |
| <b>Cost-efficacy</b>                                                                    |                      |                      |                      |                          |                  |                               |                                                                                                                                                                                                                                                                                      |
| 64 (1 RCT)                                                                              | serious <sup>a</sup> | not serious          | serious <sup>d</sup> | not serious <sup>c</sup> | not identified   | ⊕○○○<br>Very low              | An observed benefit revealed an incremental cost-effectiveness ratio of \$16,318.75 per QALY saved for the in-office group in comparison to the online group. These findings stem from a limited participant pool within a specific context, thus rendering the results less robust. |
| <b>Mobility (follow up: 6 months)</b>                                                   |                      |                      |                      |                          |                  |                               |                                                                                                                                                                                                                                                                                      |
| 296 (1 RCT)                                                                             | serious <sup>a</sup> | not serious          | serious <sup>d</sup> | not serious              | not identified   | ⊕⊕○○<br>Low                   | A solitary study indicated a significant reduction in travel distance, transportation, and waiting time for in-person visits. While the advantages for the intervention group seem intuitive, the extent of these benefits remains uncertain.                                        |
| <b>Length and frequency of consultation (follow up: mean 12 months)</b>                 |                      |                      |                      |                          |                  |                               |                                                                                                                                                                                                                                                                                      |

| Certainty assessment                                                                                                                                                                                                                                                                                                                                                                                                                                                                        |                      |                |             |                              |                   | Summary of the results |                                                                                                                                                                                       |
|---------------------------------------------------------------------------------------------------------------------------------------------------------------------------------------------------------------------------------------------------------------------------------------------------------------------------------------------------------------------------------------------------------------------------------------------------------------------------------------------|----------------------|----------------|-------------|------------------------------|-------------------|------------------------|---------------------------------------------------------------------------------------------------------------------------------------------------------------------------------------|
| 64<br>(1 RCT)                                                                                                                                                                                                                                                                                                                                                                                                                                                                               | serious <sup>a</sup> | not<br>serious | not serious | very<br>serious <sup>c</sup> | not<br>identified | ⊕○○○<br>Very low       | A single study suggested that the frequency of online visits was 1.7 times lower compared to in-person visits. However, these results are surrounded by a high degree of uncertainty. |
| <p><i>Explanations</i></p> <p>a. There are some concerns regarding the potential for bias, randomization procedures, and blinding in certain cases.</p> <p>b. Results are clinically heterogeneous. The results however show a consistent homogenous trend.</p> <p>c. Very little results were presented.</p> <p>d. The findings originate from a remote area and might hold lesser relevance for more urbanized regions.</p> <p>e. Results were based on a study with 64 participants.</p> |                      |                |             |                              |                   |                        |                                                                                                                                                                                       |

BSA: Body Surface Area; (C)DLQI: (Children's) Dermatology Life Quality Index; IGA: Investigator Global Assessment; PASI: Psoriasis Area and Severity Index; PtGA: Patient Global Assessment; QALY: Quality-Adjusted Life Years; RCT: Randomized Controlled Trial

Table SII. GRADE profile for outcomes for studies investigating patients with atopic dermatitis

| Certainty assessment                                                                                                                                                                                                                                                                                                                                                                                                              |                      |                      |                          |                           |                  |                               | Summary of the results                                                                                                                                                                                                                                                               |
|-----------------------------------------------------------------------------------------------------------------------------------------------------------------------------------------------------------------------------------------------------------------------------------------------------------------------------------------------------------------------------------------------------------------------------------|----------------------|----------------------|--------------------------|---------------------------|------------------|-------------------------------|--------------------------------------------------------------------------------------------------------------------------------------------------------------------------------------------------------------------------------------------------------------------------------------|
| Number of participants (studies)                                                                                                                                                                                                                                                                                                                                                                                                  | Risk of bias         | Inconsistency        | Indirectness             | Imprecision               | Publication bias | Overall certainty of evidence |                                                                                                                                                                                                                                                                                      |
| <b>Disease severity (follow up: 12 months; measured with: POEM, IGA, SCORAD)</b>                                                                                                                                                                                                                                                                                                                                                  |                      |                      |                          |                           |                  |                               |                                                                                                                                                                                                                                                                                      |
| 446<br>(3 RCTs)                                                                                                                                                                                                                                                                                                                                                                                                                   | serious <sup>a</sup> | serious <sup>b</sup> | not serious              | not serious               | not identified   | ⊕⊕○○<br>Low                   | The outcomes were displayed utilizing various scoring systems. No substantial distinction was observed between the intervention and control groups.                                                                                                                                  |
| <b>Quality of life (follow up: 12 months; measured with: DLQI, CDLQI and Skindex)</b>                                                                                                                                                                                                                                                                                                                                             |                      |                      |                          |                           |                  |                               |                                                                                                                                                                                                                                                                                      |
| 348<br>(2 RCTs)                                                                                                                                                                                                                                                                                                                                                                                                                   | serious <sup>a</sup> | serious <sup>b</sup> | not serious              | not serious               | not identified   | ⊕⊕○○<br>Low                   | The outcomes were displayed utilizing various scoring systems. No substantial distinction was observed between the intervention and control groups.                                                                                                                                  |
| <b>Cost-efficacy (follow up: mean 12 months)</b>                                                                                                                                                                                                                                                                                                                                                                                  |                      |                      |                          |                           |                  |                               |                                                                                                                                                                                                                                                                                      |
| 192<br>(1 RCT)                                                                                                                                                                                                                                                                                                                                                                                                                    | serious <sup>a</sup> | not serious          | not serious <sup>c</sup> | very serious <sup>d</sup> | not identified   | ⊕○○○<br>Very low              | An observed benefit revealed an incremental cost-effectiveness ratio of \$16,318.75 per QALY saved for the in-office group in comparison to the online group. These findings stem from a limited participant pool within a specific context, thus rendering the results less robust. |
| <p>a. There are some concerns regarding the potential for bias, randomization procedures, and blinding in certain cases</p> <p>b. Results are clinically heterogeneous. The results however show a consistent homogenous trend.</p> <p>c. The findings originate from a remote area and might hold lesser relevance for more urbanized regions.</p> <p>d. Results were based on a study with one study with 192 participants.</p> |                      |                      |                          |                           |                  |                               |                                                                                                                                                                                                                                                                                      |

(C)DLQI: (Children’s) Dermatology Life Quality Index; IGA: Investigator Global Assessment;  
 POEM: Patient-Oriented Eczema Measure; QALY: Quality-Adjusted Life Years; RCT: Randomized  
 Controlled Trial; SCORAD: Severity Scoring of Atopic Dermatitis
