# Supplementary figures and images for: Is Telemedicine Suitable for Patients with Chronic Inflammatory Skin Conditions? A Systematic Review
Source: PubMed Central journal article supplement — Acta Derm Venereol. 2024 May 15;104:23901. doi: 10.2340/actadv.v104.23901 (PMC11110807; doi:10.2340/actadv.v104.23901), 2024-05-15

Fig. S1. Study selection process presented in the PRISMA flow diagram.

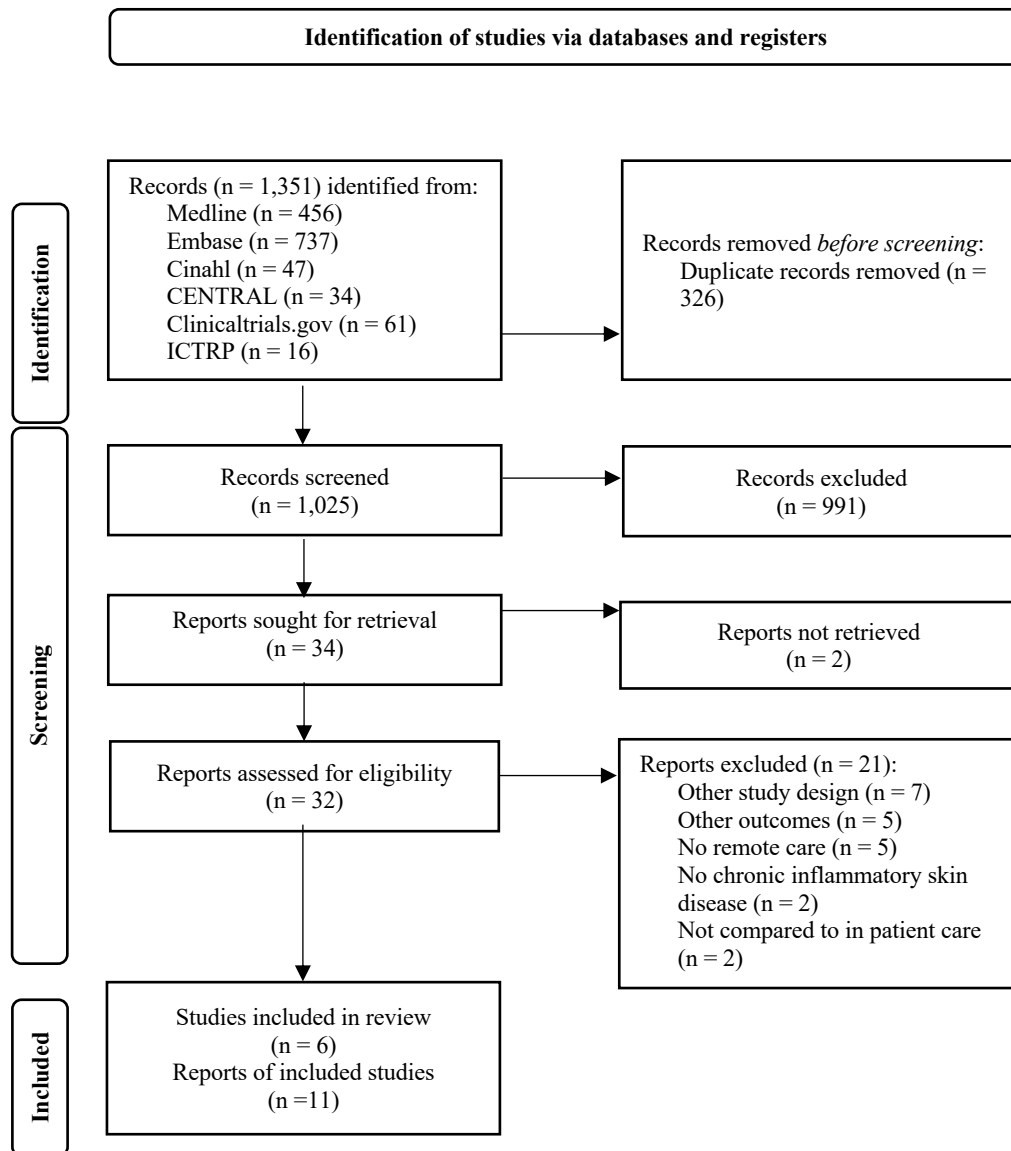

Supplement: ActaDV-104-23901-s2.pdf [file ActaDV-104-23901-s2.pdf]
